# Supplementary material
Source: publisher figshare collection journal article supplement (https://acs.figshare.com/ndownloader/files/7218122)
Supplement: Supplementary file 1 [file 7218122]

## **Metal Nanoparticle Loaded Magnetic-Chitosan Microsphere: Water Dispersible and Easily Separable Hybrid Metal Nano-Biomaterial for Catalytic Applications**

Thanusu Parandhaman,<sup>a,c</sup> Nagaraju Pentela,<sup>b,c</sup> Baskaran Ramalingam,<sup>a</sup> Debasis Samanta,<sup>b,c</sup> and  
Sujoy K. Das<sup>\*,a,c</sup>

<sup>a</sup>Biological Materials Laboratory, <sup>b</sup>Polymer Science Division, Council of Scientific and Industrial Research (CSIR)-Central Leather Research Institute (CLRI), Chennai- 600020, India, <sup>c</sup>Academic of Scientific and Innovative Research (AcSIR), New Delhi-110001, India.

**Biosynthesis of Magnetic Nanoparticle.** The biogenic synthesis of magnetic nanoparticle was carried out following incubation of magnetite precursor, akaganeite ( $-\text{FeOOH}$ ) with *S. algae* under anaerobic condition at 33 °C for 3 days. The magnetite precursor, akaganeite was initially prepared by neutralizing  $\text{FeCl}_3 \cdot 6\text{H}_2\text{O}$  (2 M) solution with NaOH (10 M) solution to make the pH 7.0 and stirred at 30 °C for overnight. The suspension was transferred in serum bottle and diluted in HEPES buffer (50 mM, pH 7.5) to make the final concentration of Fe(III) oxyhydroxide to 0.4 M followed by addition of 10 mM lactate as the electron donor. The *S. algae* cells were then added into serum bottle containing Fe(III) oxyhydroxide and lactate. The serum bottle was sealed tightly and purged with  $\text{N}_2$  (100%) gas to maintain the anaerobic condition. The reaction mixture was then incubated at 33 °C for 3 days in dark condition. Following incubation the colour of the solution changed to black from initial brown and attracted by the external magnet.

### **Results**

The decoration of Au and PdNPs on the surface of  $\text{Fe}_3\text{O}_4@\text{Ch}$  and subsequent formation of  $\text{Fe}_3\text{O}_4@\text{Ch-AuNPs}$  and  $\text{Fe}_3\text{O}_4@\text{Ch-PdNPs}$  was carried out through microwave assisted reduction of surface bound metal ions. In the process the dissolved oxygen reacted with hydroxyl group of  $\text{Fe}_3\text{O}_4@\text{Ch}$  and generate superoxide anions, which induced reduction of metal ions into metal nanoparticle (Au and PdNPs) possibly through the following steps:

---

\* **Address for communication:** Dr. Sujoy K. Das, Email: [sujoy@clri.res.in](mailto:sujoy@clri.res.in); [sujoydasiacs@gmail.com](mailto:sujoydasiacs@gmail.com). Tel: +914424437133. Fax: +914424910846.

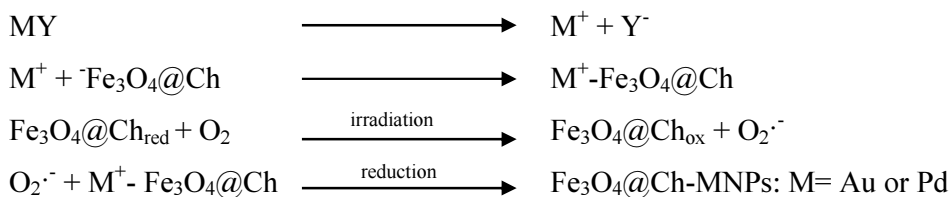

### Scherrer equation

$$D_p = \frac{K \lambda}{\beta_{1/2} \cos \theta}$$

Where

$D_p$  = Average crystallite size in Å,  $K$  = Shape factor,  $\beta$  = Full width at half maximum (FWHM) of the observed peak in radians,  $\theta$  = Bragg diffraction angle in degrees, and  $\lambda$  = X-ray wavelength in Å

Before calcination:

$$D_p = \frac{0.94 * 1.54}{(0.34 * \frac{\pi}{180}) * \cos 17.7^\circ} = 256.0 \text{ Å} = 25.6 \text{ nm}$$

After calcination:

$$D_p = \frac{0.94 * 1.54}{(0.30 * \frac{\pi}{180}) * \cos 17.75^\circ} = 290.2 \text{ Å} = 29.0 \text{ nm}$$

The calcination process slightly increased the size of the magnetite nanoparticle from 25.6 nm to 29 nm. Moreover, the results showed that crystallite size determined from Scherrer equation was considerable same with the particle size measured from FESEM analysis.

### XPS analysis

The analysis of core-level spectra of C 1s, N 1s and O 1s depicted protein signature associated with Fe<sub>3</sub>O<sub>4</sub> nanoparticles. The C 1s spectrum (**Figure S1A**) showed binding energies at 284.2, 286.1, and 287.9 eV. The peak at 284.2 eV was attributed to C–C and C–H, whereas carbon bounded to nitrogen (C–N) and hydroxyl groups (C–OH) were located at 286.1 eV. The carboxylate (–C(=O)–OH) and amide carbon (N–C=O) groups were located at 287.9 eV. **Figure S1B** showed N1s core levels peaks with three chemically distinct species at 398.8, 400.4 and 401.8 eV. These correspond to amine (–NH–), imine (–C=N–) and protonated amine functional groups respectively, associated with Fe<sub>3</sub>O<sub>4</sub> nanoparticle surface. Two distinct peaks at 532.2 and 533.8 eV in the O 1s spectrum (**Figure S1C**) represented the incorporation of C=O and C–OH components of protein moiety, respectively.

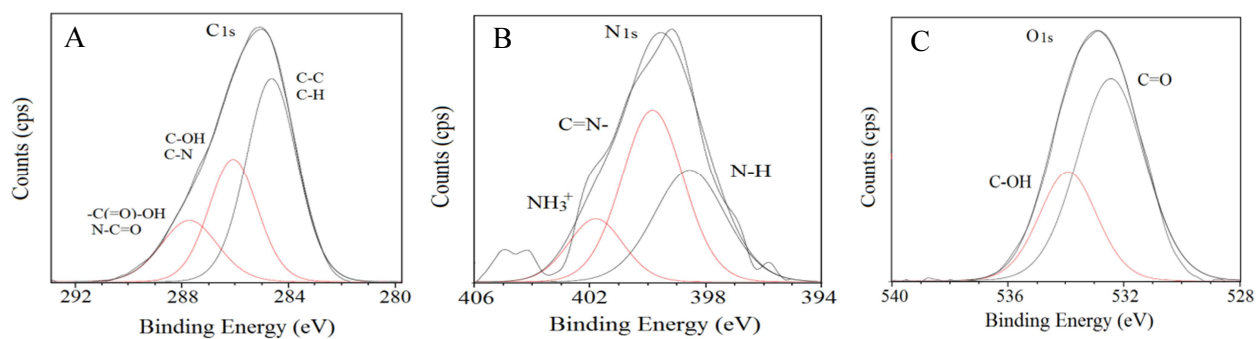

**Figure S1:** Core level XPS spectra of C 1s (A), N 1s (B) and O 1s (C) of the biosynthesized  $\text{Fe}_3\text{O}_4$  nanoparticles.

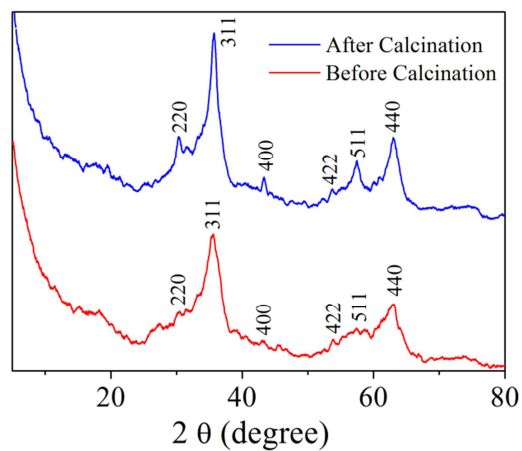

**Figure S2:** XRD of biosynthesized magnetic nanoparticles before and after calcination.

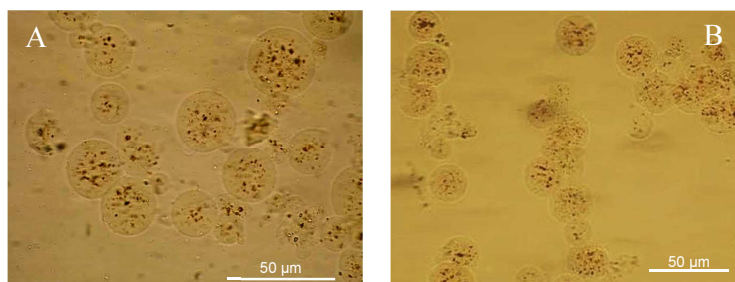

**Figure S3:** Optical microscopic images of  $\text{Fe}_3\text{O}_4$ @Ch-AuNPs (A) and  $\text{Fe}_3\text{O}_4$ @Ch-PdNPs (B).

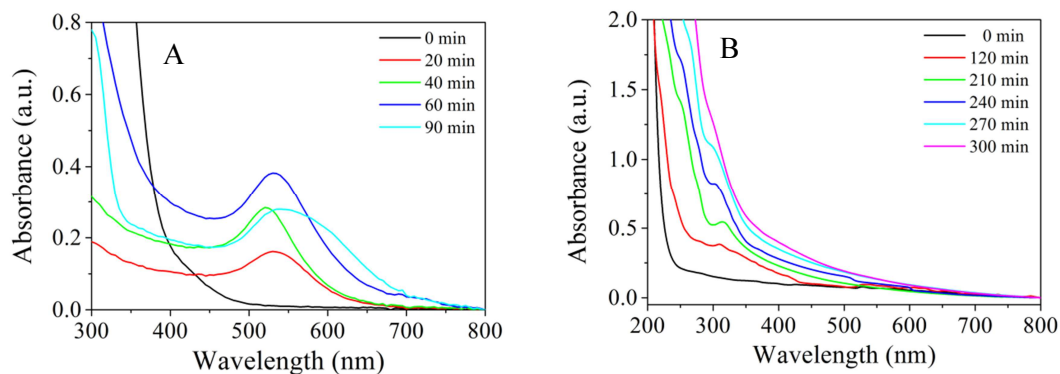

**Figure S4:** Optimization of synthesis of  $\text{Fe}_3\text{O}_4@\text{Ch-AuNPs}$  (A) and  $\text{Fe}_3\text{O}_4@\text{Ch-PdNPs}$  (B).

### PN-I-219 RESULTS (1<sup>st</sup> CYCLE)

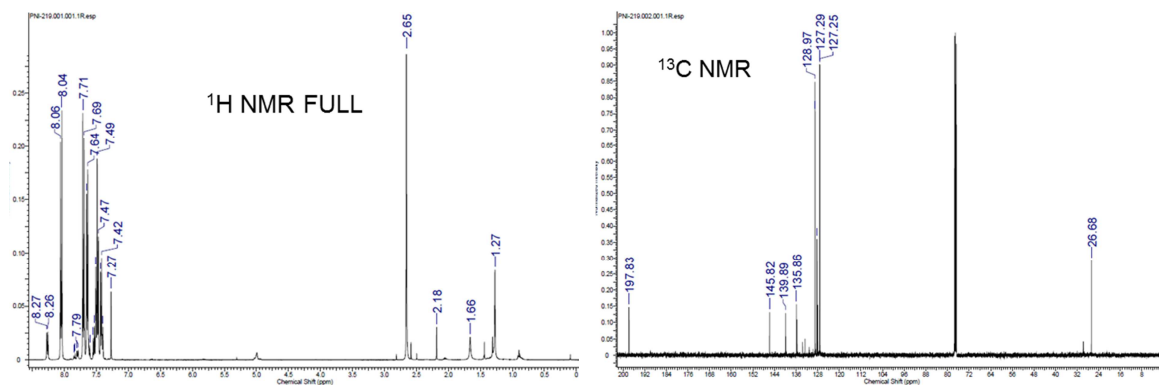

**Figure S5:** Representative NMR spectra of the product from reaction mixture (heating at 50 °C for 1 h, 1<sup>st</sup> cycle)

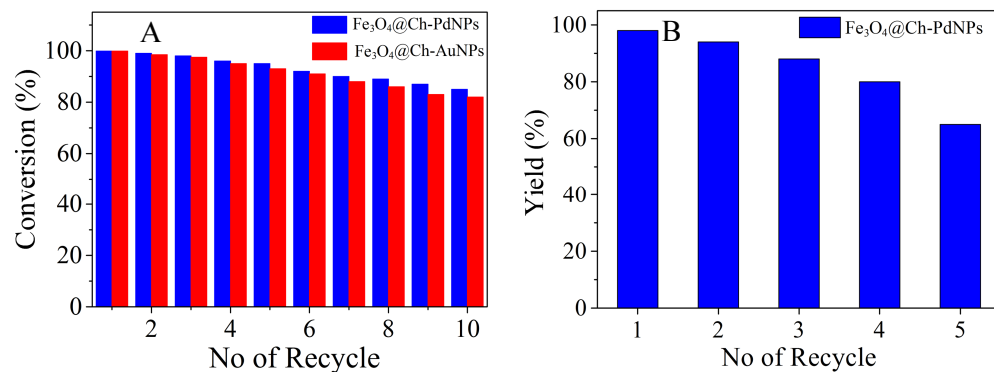

**Figure S6:** Recyclability of  $\text{Fe}_3\text{O}_4@\text{Ch-MNPs}$  in hydrogenation (A) and Suzuki coupling (B) reaction.

**Table S1:** Comparison of Apparent Rate Constants of Fe<sub>3</sub>O<sub>4</sub>@Ch-MNPs (M=Au and Pd) with Chemically Synthesized MNPs for Methylene Blue Reduction

| Nanocomposite                            | Size        | Condition              | $K_{app}$ (/ min)        | References    |
|------------------------------------------|-------------|------------------------|--------------------------|---------------|
| Fe <sub>3</sub> O <sub>4</sub> @Ch-PdNPs | 20 ± 2.9 μm | Visible light          | 1.04*                    | Present study |
| Fe <sub>3</sub> O <sub>4</sub> @Ch-PdNPs | 20 ± 2.9 μm | UV light               | 5.04*                    | Present study |
| Fe <sub>3</sub> O <sub>4</sub> @Ch-AuNPs | 22 ± 3.1 μm | Visible light          | 5.4 × 10 <sup>-1</sup> * | Present study |
| Fe <sub>3</sub> O <sub>4</sub> @Ch-AuNPs | 22 ± 3.1 μm | UV light               | 4.05*                    | Present study |
| Ag/MFC                                   | 340 nm      | 25 °C                  | 3.4 × 10 <sup>-1</sup>   | [1]           |
| Au:TiO <sub>2</sub>                      | 90 nm       | UV light               | 11.4 × 10 <sup>-3</sup>  | [2]           |
| Ag:TiO <sub>2</sub>                      | 50 nm       | UV light               | 7.1 × 10 <sup>-3</sup>   | [2]           |
| Cu:TiO <sub>2</sub>                      | 35 nm       | UV light               | 17.3 × 10 <sup>-3</sup>  | [2]           |
| Au:TiO <sub>2</sub>                      | 90 nm       | Visible light          | 6.5 × 10 <sup>-3</sup>   | [2]           |
| Ag:TiO <sub>2</sub>                      | 50 nm       | Visible light          | 4 × 10 <sup>-3</sup>     | [2]           |
| Cu:TiO <sub>2</sub>                      | 35 nm       | Visible light          | 5.5 × 10 <sup>-3</sup>   | [2]           |
| Pd/TiO <sub>2</sub> NTs                  | 220 nm      | Stimulated solar light | 1.85 × 10 <sup>-2</sup>  | [3]           |
| ZnO Nanorods                             | 5–7 nm      | Visible light          | 1.948 × 10 <sup>-2</sup> | [4]           |

\*Conditions: Methylene blue (10 mL, 20 mg/L), NaBH<sub>4</sub> (2.9 mM), Fe<sub>3</sub>O<sub>4</sub>@Ch-MNPs (2 ± 0.5 mg, containing 2.6% Pd in Fe<sub>3</sub>O<sub>4</sub>@Ch-PdNPs and 5.8% Au in Fe<sub>3</sub>O<sub>4</sub>@Ch-AuNPs), pH 7.2

**Table S2:** Comparison of rate constants of Fe<sub>3</sub>O<sub>4</sub>@Ch-MNPs (M=Au and Pd) in *p*-Nitrophenol hydrogenation reaction with chemically synthesized MNPs

| Nanocomposite                              | Size                                          | $k_{nor}$                                  | Ref.          |
|--------------------------------------------|-----------------------------------------------|--------------------------------------------|---------------|
| Fe <sub>3</sub> O <sub>4</sub> @Ch-PdNPs   | 20 ± 2.9 μm                                   | 4.9 ± 0.3 /mmol/s*                         | Present study |
| Fe <sub>3</sub> O <sub>4</sub> @Ch-AuNPs   | 22 ± 3.1 μm                                   | 3.3 ± 0.5 /mmol/s*                         | Present study |
| Ammonium bismuth citrate synthesized AuNPs | 20 – 140 nm                                   | 2.1 × 10 <sup>-3</sup> /mmol/s             | [5]           |
| Tri-sodium citrate synthesized AuNPs       | 20 – 50 nm                                    | 1 × 10 <sup>-3</sup> /mmol/s               | [5]           |
| Silver nanodentrites                       | 60 – 120 nm                                   | 3.04 × 10 <sup>-1</sup> /mmol/s            | [6]           |
| PCo <sub>2</sub> Ni <sub>1</sub>           | 52 ± 9 nm                                     | 6.68 × 10 <sup>-2</sup> /mmol/s            | [7]           |
| PNi                                        | 44 ± 12 nm                                    | 4.57 × 10 <sup>-2</sup> /mmol/s            | [7]           |
| Au-Pt BimetalicNanorod                     | Width: 7.4 ± 0.8 nm;<br>Length: 39.5 ± 6.5 nm | 1.40 × 10 <sup>-1</sup> L/s/m <sup>2</sup> | [8]           |
| Au Nanorod                                 | Width: 6.6 ± 0.3 nm;<br>Length: 34.5 ± 5.2 nm | 2.10 × 10 <sup>-1</sup> L/s/m <sup>2</sup> | [8]           |
| Palladium Clusters                         | 4 – 5 nm                                      | 1.33 × 10 <sup>-4</sup> L/s/m <sup>2</sup> | [9]           |

\*Conditions: *p*-Nitrophenol (0.1 mL, 3 × 10<sup>-3</sup> M), NaBH<sub>4</sub> (0.1 mL, 0.3 M), Fe<sub>3</sub>O<sub>4</sub>@Ch-MNPs (5 ± 0.1 mg, containing 2.6% Pd in Fe<sub>3</sub>O<sub>4</sub>@Ch-PdNPs and 5.8% Au in Fe<sub>3</sub>O<sub>4</sub>@Ch-AuNPs), reaction temperature at 30 °C

**Table S3:** Comparative study of TON and TOF for Suzuki coupling reaction those are reported values with our results.

| R <sub>1</sub>    | X  | R <sub>2</sub>                                               | Reaction condition:                                                                                       | Yield (%) | TON   | TOF    | Ref           |
|-------------------|----|--------------------------------------------------------------|-----------------------------------------------------------------------------------------------------------|-----------|-------|--------|---------------|
| COCH <sub>3</sub> | I  | H                                                            | Refluxing/ H <sub>2</sub> O/ Fe <sub>3</sub> O <sub>4</sub> @Ch-PdNPs/ 540 min/ 100 °C                    | 99        | 50769 | 5641*  | Present study |
| COCH <sub>3</sub> | I  | H                                                            | Sunlight/ H <sub>2</sub> O/ Fe <sub>3</sub> O <sub>4</sub> @Ch-PdNPs/ 300 min/ 37± 3 °C                   | 73        | 37435 | 7437*  | Present study |
| COCH <sub>3</sub> | I  | H                                                            | Lab condition/H <sub>2</sub> O/ Fe <sub>3</sub> O <sub>4</sub> @Ch-PdNPs/ 45min/ 52 ± 1 °C                | 90        | 46153 | 61538* | Present study |
| COCH <sub>3</sub> | I  | H                                                            | Microwave/ H <sub>2</sub> O/ Fe <sub>3</sub> O <sub>4</sub> @Ch-PdNPs/ 60 min/ 50 ± 2 °C                  | 98        | 50256 | 50256* | Present study |
| H                 | I  | m-CH <sub>3</sub>                                            | Stirring/EtOH–H <sub>2</sub> O (1:1)/ CB[6]-PdNPs/ 300 min/room temperature                               | 89        | 1780  | 3560   | [10]          |
| H                 | Br | o-Py                                                         | Stirring/EtOH–H <sub>2</sub> O (1:1)/ CB[6]-PdNPs/ 300 min/room temperature                               | 8         | 1600  | 320    | [10]          |
| H                 | I  | H                                                            | H <sub>2</sub> O/EtOH (1:1)/Poly-(sodium sulfonate-triazolymethyl)–styrene stabilized PdNPs/ 24 h / 25 °C | 82        | 990   | 1980   | [11]          |
| H                 | I  | H                                                            | MeOH (2:1)/Dendrimer-encapsulated PdNPs (1 mol % Pd)/CHCl <sub>3</sub> / 24 h/ 25 °C                      | 68        | 68    | 17     | [12]          |
| H <sub>3</sub> CO | I  | B(OH) <sub>2</sub>                                           | Refluxing/ H <sub>2</sub> O/ Fe <sub>3</sub> O <sub>4</sub> @PUNP/ 60 min/ 90 °C                          | 95        | 950   | 950    | [13]          |
| COCH <sub>3</sub> | I  | 2-Me                                                         | H <sub>2</sub> O/0.1% Pd-FSG/300 min/100 °C                                                               | 90        | 3780  | 158    | [14]          |
| H                 | I  | CO <sub>2</sub> Me                                           | Aerobic/ DMF/ PdNPs/ 90 min/ 110 °C                                                                       | >99       | 10000 | 6667   | [15]          |
| 4-MeO             | Br | CO <sub>2</sub> Me                                           | Aerobic/ DMF/ PdNPs/ 540 min/ 130 °C                                                                      | 57        | 114   | 13     | [15]          |
| COCH <sub>3</sub> | Br | B(OH) <sub>2</sub>                                           | Microwave irradiation/H <sub>2</sub> O/HNT-PNIPAAM/ PdNPs/10 min/ 120 °C                                  | >95       | 6250  | 37500  | [16]          |
| COCH <sub>3</sub> | I  | B(OH) <sub>2</sub>                                           | Microwave irradiation H <sub>2</sub> O/HNT-PNIPAAM/ PdNPs/10 min/120 °C                                   | 94        | 5880  | 35250  | [16]          |
| H                 | I  | Ph                                                           | Solvent free/ H <sub>2</sub> O / PS-ppdot-Pd(II)(1)/ 180 min/ room temperature                            | 97        | 96    | 32     | [17]          |
| 4-OMe             | I  | H                                                            | XG-Pd, K <sub>2</sub> CO <sub>3</sub> /12 h/ 90 °C                                                        | 60        | 391   | 32     | [18]          |
| H                 | I  | CH <sub>3</sub> CH <sub>2</sub> CH <sub>2</sub> <sup>−</sup> | H <sub>2</sub> O/ Pd–Fe–H (2)/360 min/ 80 °C                                                              | 96        | 45    | 5      | [19]          |
| H                 | I  | Ph                                                           | Solvent free/diatomit-supported Pd(II) salophen complex(0.3)/ 300 min/ room temperature                   | 97        | 320   | 64     | [20]          |

\*Conditions: Phenylboronic acid (183 mg, 1.5 mmol), *p*-Iodoacetophenone (246.5 mg, 1 mmol), K<sub>2</sub>CO<sub>3</sub> (276.5 mg, 2 mmol), Fe<sub>3</sub>O<sub>4</sub>@Ch-PdNPs (8 ± 0.5 mg, containing 2.6% Pd), H<sub>2</sub>O and under aerobic condition.

## References

1. Zhu, M.; Wang, C.; Meng, D.; Diao, G. In Situ Synthesis of Silver Nanostructures on Magnetic Fe<sub>3</sub>O<sub>4</sub>@C Core–Shell Nanocomposites and their Application in Catalytic Reduction Reactions. *J. Mater. Chem. A* **2013**, *1*, 2118–2125.
2. Sangpour, P.; Hashemi, F.; Moshfegh, A. Z. Photoenhanced Degradation of Methylene Blue on Cosputtered M:TiO<sub>2</sub> (M = Au, Ag, Cu) Nanocomposite Systems: A Comparative Study. *J. Phys. Chem. C* **2010**, *114*, 13955–13961.
3. Zhang, Z.; Yu, Y.; Wang, P. Hierarchical Top–Porous/Bottom–Tubular TiO<sub>2</sub> Nanostructures Decorated with Pd Nanoparticles for Efficient Photoelectrocatalytic Decomposition of Synergistic Pollutants. *ACS Appl. Mater. Interfaces* **2012**, *4*, 990–996.
4. Baruah, S.; Mahmood, M. A.; Myint, M. T. Z.; Bora, T.; Dutta, J. Enhanced Visible Light Photocatalysis through Fast Crystallization of Zinc Oxide Nanorods. *Beilstein J. Nanotechnol.* **2010**, *1*, 14–20.
5. Das, S. K.; Dickinson, C.; Lafir, F.; Brougham, D. F.; Marsili, E. Synthesis, Characterization and Catalytic Activity of Gold Nanoparticles Biosynthesized with *Rhizopus oryzae* Protein Extract. *Green Chem.* **2012**, *14*, 1322–1334.
6. Zhang, W.; Tan, F.; Wang, W.; Qiu, X.; Qiao, X.; Jianguo Chen, J. Facile, Template–Free Synthesis of Silver Nanodendrites with High Catalytic Activity for the Reduction of *p*-Nitrophenol. *J. Hazard. Mater.* **2012**, *217*, 36–42.
7. Rashid, M. H.; Raula, M.; Mandal, T. K. Polymer Assisted Synthesis of Chain–like Cobalt–Nickel Alloy Nanostructure: Magnetically Recoverable and Reusable Catalysts with High Activities. *J. Mater. Chem.* **2011**, *21*, 4904–4917.
8. Lu, Y.; Yuan, J.; Polzer, F.; Drechsler, M.; Preussner, J. In Situ Growth of Catalytic Active Au–Pt Bimetallic Nanorods in Thermoresponsive Core–Shell Microgels. *ACS Nano* **2010**, *4*, 7078–7086.
9. Halder, A.; Patra, S.; Viswanath, B.; Munichandraiah, N.; Ravishankar, N. Porous, Catalytically Active Palladium Nanostructures by Tuning Nanoparticle Interactions in an Organic Medium. *Nanoscale* **2011**, *3*, 725–730.
10. Karami, K.; Naeini, N. H. Palladium Nanoparticles Supported on Cucurbit [6] uril: an Efficient Heterogeneous Catalyst for the Suzuki Reaction under Mild Conditions. *Appl. Organometal. Chem.* **2015**, *29*, 33–39.
11. Ornelas, C.; Diallo, A. K.; Ruiz, J.; Astruc, D. “Click” Polymer-Supported Palladium Nanoparticles as Highly Efficient Catalysts for Olefin Hydrogenation and Suzuki Coupling Reactions under Ambient Conditions. *Adv. Synth. Catal.* **2009**, *351*, 2147–2154.
12. Diallo, A.; Ornelas, C.; Salmon, L.; Aranzaes, J. R.; Astruc, D. “Homeopathic” Catalytic Activity and Atom–Leaching Mechanism in Miyaura–Suzuki Reactions under Ambient Conditions with Precise Dendrimer–Stabilized Pd Nanoparticles. *Angew. Chem. Int. Ed.* **2007**, *46*, 8644–8648.
13. Yang, J.; Wang, D.; Liu, W.; Zhang, X.; Bian, F.; Yu, W. Palladium Supported on a Magnetic Microgel: an Efficient and Recyclable Catalyst for Suzuki and Heck Reactions in Water. *Green Chem.* **2013**, *15*, 3429–3437.
14. Bernini, R.; Cacchi, S.; Fabrizi, G.; Forte, G.; Petrucci, F.; Prastaro, A.; Niembro, S.; Shafir, A.; Vallribera, A. Perfluoro–Tagged, Phosphine–Free Palladium Nanoparticles

- Supported on Silica Gel: Application to Alkynylation of Aryl Halides, Suzuki–Miyaura Cross–Coupling, and Heck Reactions under Aerobic Conditions. *Green Chem.* **2010**, *12*, 150–158.
15. Diego, W.; Alonso, A.; Najera, C. Oxime-Derived Palladacycles as Source of Palladium Nanoparticles. *Chem. Soc. Rev.* **2010**, *39*, 2891–2902.
  16. Massaro, M.; Schembri, V.; Campisciano, V.; Cavallaro, G.; Lazzara, G.; Milioto, S.; Noto, R.; Parisib, F.; Riela, S. Design of PNIPAAm Covalently Grafted on Halloysite Nanotubes as a Support for Metal-Based Catalyst. *RSC Adv.* **2016**, *6*, 55312–55318.
  17. Bakherad, M.; Keivanloo, A.; Bahramian, B.; Jajarmi, S. Copper- and Solvent-Free Sonogashira Coupling Reactions of Aryl Halides With Terminal Alkynes Catalyzed by 1-phenyl-1,2-propanedione-2-oxime Thiosemi-Carbazone-Functionalized Polystyrene Resin Supported Pd(II) Complex under Aerobic Conditions. *Appl. Catal. A* **2010**, *390*, 135–140.
  18. Maity, M.; Maitra, U. An Easily Prepared Palladium–Hydrogel Nanocomposite Catalyst for C–C Coupling Reactions. *J. Mater. Chem. A* **2014**, *2*, 18952–18958.
  19. Li, H.; Zhu, Z. H.; Li, H. X.; Li, P.; Zhou, X. G. Recyclable Hollow Pd–Fe Nanospheric Catalyst for Sonogashira-, Heck-, and Ullmann-Type Coupling Reactions of Aryl Halide in Aqueous Media. *J. Colloid. Interf. Sci.* **2010**, *349*, 613–619.
  20. Bahramian, B.; Bakherad, M.; Keivanloo, A.; Bakherad, Z.; Karrabi, B. The First Heterogeneous Sonogashira Coupling Reaction of Aryl Halides With Terminal Alkynes Catalyzed by Diatomite-Supported Palladium(II) Salophen Complex. *Appl. Organomet. Chem.* **2011**, *25*, 420–423.
